# Supplementary material for: Preprocessing algorithm and tightening constraints for multiperiod blend scheduling: cost minimization
Source: Springer Nature journal article supplement (doi:10.1007/s10898-020-00882-3), 2020-03-14
Supplement: 10898_2020_882_MOESM1_ESM.pdf [file 10898_2020_882_MOESM1_ESM.pdf]

# Preprocessing Algorithm and Tightening Constraints for Multiperiod Blend Scheduling: Cost Minimization

Yifu Chen, Christos T. Maravelias

Department of Chemical and Biological Engineering, University of Wisconsin-Madison

1415 Engineering Dr., Madison, WI 53706, USA

## Supporting material

**Table S1.**  $M^C$  for the motivating example

|            | Objective and constraints in $M^C$                                                                                                                                                                                         | Description |
|------------|----------------------------------------------------------------------------------------------------------------------------------------------------------------------------------------------------------------------------|-------------|
| <i>min</i> | $10\tilde{F}_{S1,J1,0} + 10\tilde{F}_{S1,J1,1} + 5\tilde{F}_{S2,J1,0} + 5\tilde{F}_{S2,J1,1}$                                                                                                                              | Objective   |
| <i>s.t</i> | $I_{J1,1} = \tilde{F}_{S1,J1,0} + \tilde{F}_{S2,J1,0} - \bar{F}_{J1,P1,0}$<br>$I_{J1,2} = I_{J1,1} + \tilde{F}_{S1,J1,1} + \tilde{F}_{S2,J1,1} - \bar{F}_{J1,P1,1}$                                                        | Eqn. (1)    |
|            | $\tilde{I}_{S1,1} = 1 - \tilde{F}_{S1,J1,0}$<br>$\tilde{I}_{S1,2} = \tilde{I}_{S1,1} - \tilde{F}_{S1,J1,1}$<br>$\tilde{I}_{S2,1} = 1 - \tilde{F}_{S2,J1,0}$<br>$\tilde{I}_{S2,2} = \tilde{I}_{S2,1} - \tilde{F}_{S2,J1,1}$ | Eqn. (2)    |
|            | $\bar{I}_{P1,1} = \bar{F}_{J1,P1,0}$<br>$\bar{I}_{P1,2} = \bar{I}_{P1,1} + \bar{F}_{J1,P1,2} - 1$                                                                                                                          | Eqn. (3)    |
|            | $\tilde{F}_{S1,J1,0} \leq X_{S1,J1,0}$<br>$\tilde{F}_{S2,J1,0} \leq X_{S2,J1,0}$<br>$\tilde{F}_{S1,J1,1} \leq X_{S1,J1,1}$<br>$\tilde{F}_{S2,J1,1} \leq X_{S2,J1,1}$                                                       | Eqn. (4)    |
|            | $\bar{F}_{J1,P1,0} \leq \bar{X}_{J1,P1,0}$<br>$\bar{F}_{J1,P1,1} \leq \bar{X}_{J1,P1,1}$                                                                                                                                   |             |
|            | $X_{S1,J1,0} \leq 1 - \bar{X}_{J1,P1,0}$<br>$X_{S2,J1,0} \leq 1 - \bar{X}_{J1,P1,0}$<br>$X_{S1,J1,1} \leq 1 - \bar{X}_{J1,P1,1}$<br>$X_{S2,J1,1} \leq 1 - \bar{X}_{J1,P1,1}$                                               | Eqn. (5)    |
|            | $I_{J1,1}C_{Q1,J1,1} = \tilde{F}_{S1,J1,0} + 0.8\tilde{F}_{S2,J1,0}$<br>$I_{J1,2}C_{Q1,J1,2} = I_{J1,1}C_{Q1,J1,1} + \tilde{F}_{S1,J1,1} + 0.8\tilde{F}_{S2,J1,1} - \bar{F}_{J1,P1,1}C_{Q1,J1,1}$                          | Eqn. (6)    |
|            | $C_{Q1,J1,1} \geq 0.9 - M(1 - \bar{X}_{J1,P1,1})$                                                                                                                                                                          | Eqn. (7)    |

Eqn. (27) – (29) for multiple due times:

$$\sum_{t' \leq t} \hat{F}_{s,p,t'} \geq \hat{\omega}_{s,p,t}, \quad s, p, t \text{ s.t. } \delta_{p,t} > 0 \quad (27')$$

$$\sum_{s \in \mathbf{S}_{p,q}^U} \sum_{t' \leq t} (\hat{\sigma}_{p,q}^U - \sigma_{s,q}) \hat{F}_{s,p,t'} \geq (\hat{\sigma}_{p,q}^U - \sigma_{p,q}^U) \omega_{p,t} + \sum_{s \notin \mathbf{S}_{p,q}^U} (\sigma_{s,q} - \hat{\sigma}_{p,q}^U) \hat{\omega}_{s,p,t}, \quad (28')$$

$$p, q \in \mathbf{Q}_p^M, t \text{ s.t. } \delta_{p,t} > 0$$

$$\sum_{s \in \mathbf{S}_{p,q}^L} \sum_{t' \leq t} (\sigma_{s,q} - \hat{\sigma}_{p,q}^L) \hat{F}_{s,p} \geq (\sigma_{p,q}^L - \hat{\sigma}_{p,q}^L) \omega_{p,t} + \sum_{s \notin \mathbf{S}_{p,q}^L} (\hat{\sigma}_{p,q}^L - \sigma_{s,q}) \hat{\omega}_{s,p,t}, \quad (29')$$

$$p, q \in \mathbf{Q}_p^M, t \text{ s.t. } \delta_{p,t} > 0$$

**Table S2.** Property data for Instance 1 - 5

| Property | S1   | S2   | S3   | S4   | S5   | S6   | S7   |
|----------|------|------|------|------|------|------|------|
| Q1       | 0    | 0    | 1    | 0    | 0.92 | 0.86 | 0    |
| Q2       | 0    | 0    | 0.96 | 0    | 0.91 | 0.71 | 0    |
| Q3       | 0    | 0    | 0.85 | 0    | 0.8  | 0.85 | 0    |
| Q4       | 0.33 | 0.07 | 0.81 | 0.52 | 0.84 | 0.97 | 1    |
| Q5       | 0.24 | 0.13 | 0.87 | 1    | 0.9  | 0.91 | 0.16 |
| Q6       | 0.04 | 0.08 | 0.7  | 0    | 0.66 | 0.83 | 0.03 |
| Q7       | 1    | 1    | 0.97 | 0    | 1    | 1    | 0    |

**Note:** Values in the original literature are scaled to [0,1]

**Table S3.** Property data for Instance 6 - 12

| Property | S1   | S2   | S3   | S4   | S5    | S6   | S7   | S8   | S9   |
|----------|------|------|------|------|-------|------|------|------|------|
| Q1       | 0.57 | 0.69 | 0.74 | 0.76 | 0.63  | 0.78 | 0.96 | 1    | 0.61 |
| Q2       | 0.32 | 0.16 | 0.2  | 0.12 | 0.4   | 0.04 | 0.03 | 0.25 | 1    |
| Q3       | 1    | 0.5  | 0    | 0.06 | 0     | 0    | 0.09 | 0.02 | 0.38 |
| Q4       | 0.65 | 0.82 | 1    | 0    | 0.08  | 0    | 0    | 0.21 | 0.08 |
| Q5       | 0.52 | 0.66 | 1    | 0    | 0     | 0    | 0    | 0.4  | 0.5  |
| Q6       | 0.04 | 1    | 0.04 | 0    | 0.017 | 0.03 | 0    | 0    | 0    |
| Q7       | 0.92 | 0.83 | 0.76 | 0.98 | 0.93  | 0.89 | 0.71 | 0.84 | 1    |
| Q8       | 0.43 | 0.79 | 0.3  | 0.45 | 0.25  | 0.46 | 0.37 | 0.69 | 1    |
| Q9       | 0.01 | 0.04 | 0.11 | 0.07 | 0     | 0    | 0    | 1    | 0.05 |

**Note:** Values in the original literature are scaled to [0,1]

**Table S4.** Property data for Instance 13 - 15

| Property | S1  | S2   | S3   | S4   | S5 | S6   | S7   | S8   |
|----------|-----|------|------|------|----|------|------|------|
| Q1       | 0.4 | 0.67 | 0.87 | 0.41 | 1  | 0.42 | 0.64 | 0.84 |

**Note:** Values in the original literature are scaled to [0,1]

**Table S5.** Property data for Instance 13 - 15

| Property | S1   | S2   |
|----------|------|------|
| Q1       | 0.06 | 0.26 |

**Table S6.** Product specification for Instances 1 - 5

| Property | P1        | P2        | P3        |
|----------|-----------|-----------|-----------|
| Q1       | [0, 0.8]  | [0, 0.8]  | [0, 0.8]  |
| Q2       | [0, 0.79] | [0, 0.79] | [0, 0.79] |
| Q3       | [0.87,1]  | [0.91,1]  | [0.93,1]  |
| Q4       | [0, 0.9]  | [0, 0.9]  | [0, 0.9]  |
| Q5       | [0.89,1]  | [0.92,1]  | [0.95,1]  |
| Q6       | [0.89,1]  | [0.89,1]  | [0.89,1]  |
| Q7       | [0, 0.21] | [0, 0.21] | [0, 0.21] |

**Note:** Values in the original literature are scaled to [0,1]

**Table S7.** Product specification for Instances 6 - 12

| Property | P1        | P2        | P3        | P4        |
|----------|-----------|-----------|-----------|-----------|
| Q1       | [0, 0.73] | [0, 0.74] | [0, 0.72] | [0, 0.68] |
| Q2       | [0, 0.39] | [0, 0.39] | [0, 0.39] | [0, 0.39] |
| Q3       | [0, 0.56] | [0, 0.62] | [0, 0.55] | [0, 0.62] |
| Q4       | [0, 0.72] | [0, 0.77] | [0, 0.78] | [0, 0.75] |
| Q5       | [0, 0.73] | [0, 0.75] | [0, 0.88] | [0, 0.83] |
| Q6       | [0, 0.84] | [0, 0.76] | [0, 0.84] | [0, 0.76] |
| Q7       | [0.74, 1] | [0.74, 1] | [0.73, 1] | [0.74, 1] |
| Q8       | [0, 0.95] | [0, 0.91] | [0, 0.90] | [0, 0.94] |
| Q9       | [0, 0.10] | [0, 0.10] | [0, 0.12] | [0, 0.11] |

**Note:** Values in the original literature are scaled to [0,1]

**Table S8.** Product specification for Instances 13 - 15

| Property | P1           | P2           | P3           |
|----------|--------------|--------------|--------------|
| Q1       | [0.40, 0.47] | [0.57, 0.67] | [0.80, 0.87] |

**Note:** Values in the original literature are scaled to [0,1]

**Table S9.** Product specification for Instances 16 - 20

| Property | P1        | P2     |
|----------|-----------|--------|
| Q1       | [0, 0.16] | [0, 1] |

**Table S10.** Variable cost coefficient  $\tilde{\beta}_{s,j}$ 

| Stream | Instance 1 - 5 | Instance 6 - 12 | Instance 13 - 15 | Instance 16 - 20 |
|--------|----------------|-----------------|------------------|------------------|
| S1     | 29.2           | 20              | 3                | 2                |
| S2     | 11.5           | 24              | 5                | 1                |
| S3     | 20             | 30              | 6.5              | –                |
| S4     | 22             | 25              | 3.1              | –                |
| S5     | 25             | 22              | 7.5              | –                |
| S6     | 19.7           | 27              | 3.17             | –                |
| S7     | 24.5           | 50              | 4.83             | –                |
| S8     | –              | 50              | 6.33             | –                |
| S9     | –              | 22.5            | –                | –                |

**Note:** In tested instances,  $\tilde{\beta}_{s,j}$  are the same for every  $j$ .

**Table S11.** Fixed cost coefficient  $\tilde{\alpha}_{s,j}$ 

|                        | Instance 5 | Instance 15 | Instance 18 |
|------------------------|------------|-------------|-------------|
| $\tilde{\alpha}_{s,j}$ | 10         | 1           | 0.5         |

**Note:** In tested instances,  $\tilde{\alpha}_{s,j}$  are the same for every  $(s, j)$ .

**Table S12.** Stream availability and product demand for Instance 1 and 5

| Stream/Prodouct | $\xi_{s,T0}$ | $\xi_{s,T1}$ | $\xi_{s,T2}$ | $\delta_{p,T2}$ | $\delta_{p,T3}$ | $\delta_{p,T4}$ | $\delta_{p,T5}$ |
|-----------------|--------------|--------------|--------------|-----------------|-----------------|-----------------|-----------------|
| S1 to S7        | 50           | 30           | 20           | -               | -               | -               | -               |
| P1              | -            | -            | -            | 70              | 70              | 70              | 70              |
| P2              | -            | -            | -            | 50              | 50              | 50              | 50              |
| P3              | -            | -            | -            | 30              | 30              | 30              | 30              |

**Table S13.** Stream availability and product demand for Instance 2

| Stream/Prodouct | $\xi_{s,T0}$ | $\xi_{s,T1}$ | $\xi_{s,T2}$ | $\delta_{p,T2}$ | $\delta_{p,T3}$ | $\delta_{p,T4}$ | $\delta_{p,T5}$ |
|-----------------|--------------|--------------|--------------|-----------------|-----------------|-----------------|-----------------|
| S1 to S7        | 50           | 30           | 20           | -               | -               | -               | -               |
| P1              | -            | -            | -            | 75              | 75              | 75              | 75              |
| P2              | -            | -            | -            | 55              | 55              | 55              | 55              |
| P3              | -            | -            | -            | 35              | 35              | 35              | 35              |

**Table S14.** Stream availability and product demand for Instance 3

| Stream/Prodouct | $\xi_{s,T0}$ | $\xi_{s,T1}$ | $\xi_{s,T2}$ | $\delta_{p,T2}$ | $\delta_{p,T3}$ | $\delta_{p,T4}$ | $\delta_{p,T5}$ |
|-----------------|--------------|--------------|--------------|-----------------|-----------------|-----------------|-----------------|
| S1 to S7        | 50           | 30           | 20           | -               | -               | -               | -               |
| P1              | -            | -            | -            | 80              | 80              | 80              | 80              |
| P2              | -            | -            | -            | 60              | 60              | 60              | 60              |
| P3              | -            | -            | -            | 40              | 40              | 40              | 40              |

**Table S15.** Stream availability and product demand for Instance 4

| Stream/Prodouct | $\xi_{s,T0}$ | $\xi_{s,T1}$ | $\xi_{s,T2}$ | $\delta_{p,T2}$ | $\delta_{p,T3}$ | $\delta_{p,T4}$ | $\delta_{p,T5}$ |
|-----------------|--------------|--------------|--------------|-----------------|-----------------|-----------------|-----------------|
| S1 to S7        | 50           | 30           | 20           | -               | -               | -               | -               |
| P1              | -            | -            | -            | 85              | 85              | 85              | 85              |
| P2              | -            | -            | -            | 65              | 65              | 65              | 65              |
| P3              | -            | -            | -            | 45              | 45              | 45              | 45              |

**Table S16.** Stream availability and product demand for Instance 6

| Stream/Prodouct | $\xi_{s,T0}$ | $\xi_{s,T1}$ | $\xi_{s,T2}$ | $\delta_{p,T2}$ | $\delta_{p,T3}$ | $\delta_{p,T4}$ | $\delta_{p,T5}$ |
|-----------------|--------------|--------------|--------------|-----------------|-----------------|-----------------|-----------------|
| S1 to S9        | 50           | 30           | 20           | -               | -               | -               | -               |
| P1              | -            | -            | -            | 70              | 70              | 70              | 70              |
| P2              | -            | -            | -            | 50              | 50              | 50              | 50              |
| P3              | -            | -            | -            | 30              | 30              | 30              | 30              |
| P4              | -            | -            | -            | 40              | 40              | 40              | 40              |

**Table S17.** Stream availability and product demand for Instance 7

| Stream/Prodouct | $\xi_{s,T0}$ | $\xi_{s,T1}$ | $\xi_{s,T2}$ | $\delta_{p,T2}$ | $\delta_{p,T3}$ | $\delta_{p,T4}$ | $\delta_{p,T5}$ |
|-----------------|--------------|--------------|--------------|-----------------|-----------------|-----------------|-----------------|
| S1 to S9        | 50           | 30           | 20           | -               | -               | -               | -               |
| P1              | -            | -            | -            | 75              | 75              | 75              | 75              |
| P2              | -            | -            | -            | 55              | 55              | 55              | 55              |
| P3              | -            | -            | -            | 35              | 35              | 35              | 35              |
| P4              | -            | -            | -            | 45              | 45              | 45              | 45              |

**Table S18.** Stream availability and product demand for Instance 8

| Stream/Prodouct | $\xi_{s,T0}$ | $\xi_{s,T1}$ | $\xi_{s,T2}$ | $\delta_{p,T2}$ | $\delta_{p,T3}$ | $\delta_{p,T4}$ | $\delta_{p,T5}$ |
|-----------------|--------------|--------------|--------------|-----------------|-----------------|-----------------|-----------------|
| S1 to S9        | 50           | 30           | 20           | -               | -               | -               | -               |
| P1              | -            | -            | -            | 80              | 80              | 80              | 80              |
| P2              | -            | -            | -            | 60              | 60              | 60              | 60              |
| P3              | -            | -            | -            | 40              | 40              | 40              | 40              |
| P4              | -            | -            | -            | 50              | 50              | 50              | 50              |

**Table S19.** Stream availability and product demand for Instance 9

| Stream/Prodouct | $\xi_{s,T0}$ | $\xi_{s,T1}$ | $\xi_{s,T2}$ | $\delta_{p,T2}$ | $\delta_{p,T3}$ | $\delta_{p,T4}$ | $\delta_{p,T5}$ |
|-----------------|--------------|--------------|--------------|-----------------|-----------------|-----------------|-----------------|
| S1 to S9        | 50           | 30           | 20           | -               | -               | -               | -               |
| P1              | -            | -            | -            | 85              | 85              | 85              | 85              |
| P2              | -            | -            | -            | 65              | 65              | 65              | 65              |
| P3              | -            | -            | -            | 45              | 45              | 45              | 45              |
| P4              | -            | -            | -            | 55              | 55              | 55              | 55              |

**Table S20.** Stream availability and product demand for Instance 10

| Stream/Prodoct | $\xi_{s,T0}$ | $\xi_{s,T1}$ | $\xi_{s,T2}$ | $\delta_{p,T2}$ | $\delta_{p,T3}$ | $\delta_{p,T4}$ | $\delta_{p,T5}$ |
|----------------|--------------|--------------|--------------|-----------------|-----------------|-----------------|-----------------|
| S1 to S9       | 50           | 30           | 20           | -               | -               | -               | -               |
| P1             | -            | -            | -            | 90              | 90              | 90              | 90              |
| P2             | -            | -            | -            | 70              | 70              | 70              | 70              |
| P3             | -            | -            | -            | 50              | 50              | 50              | 50              |
| P4             | -            | -            | -            | 60              | 60              | 60              | 60              |

**Table S21.** Stream availability and product demand for Instance 11

| Stream/Prodoct | $\xi_{s,T0}$ | $\xi_{s,T1}$ | $\xi_{s,T2}$ | $\delta_{p,T2}$ | $\delta_{p,T3}$ | $\delta_{p,T4}$ | $\delta_{p,T5}$ |
|----------------|--------------|--------------|--------------|-----------------|-----------------|-----------------|-----------------|
| S1 to S9       | 50           | 30           | 20           | -               | -               | -               | -               |
| P1             | -            | -            | -            | 70              | 70              | 70              | 70              |
| P2             | -            | -            | -            | 50              | 50              | 50              | 50              |
| P3             | -            | -            | -            | 35              | 35              | 35              | 35              |
| P4             | -            | -            | -            | 40              | 40              | 40              | 40              |

**Table S22.** Stream availability and product demand for Instance 12

| Stream/Prodoct | $\xi_{s,T0}$ | $\xi_{s,T1}$ | $\xi_{s,T2}$ | $\delta_{p,T2}$ | $\delta_{p,T3}$ | $\delta_{p,T4}$ | $\delta_{p,T5}$ |
|----------------|--------------|--------------|--------------|-----------------|-----------------|-----------------|-----------------|
| S1 to S9       | 50           | 30           | 20           | -               | -               | -               | -               |
| P1             | -            | -            | -            | 70              | 70              | 70              | 70              |
| P2             | -            | -            | -            | 50              | 50              | 50              | 50              |
| P3             | -            | -            | -            | 30              | 30              | 30              | 30              |
| P4             | -            | -            | -            | 45              | 45              | 45              | 45              |

**Table S23.** Stream availability and product demand for Instance 13

| Stream/Prodoct | $\xi_{s,T0}$ | $\xi_{s,T1}$ | $\xi_{s,T2}$ | $\delta_{p,T2}$ | $\delta_{p,T3}$ | $\delta_{p,T4}$ | $\delta_{p,T5}$ |
|----------------|--------------|--------------|--------------|-----------------|-----------------|-----------------|-----------------|
| S1 to S3       | 50           | 30           | 20           | -               | -               | -               | -               |
| P1             | -            | -            | -            | 70              | 70              | 70              | 70              |
| P2             | -            | -            | -            | 50              | 50              | 50              | 50              |
| P3             | -            | -            | -            | 30              | 30              | 30              | 30              |
| P4             | -            | -            | -            | 30              | 30              | 30              | 30              |

**Table S24.** Stream availability and product demand for Instance 14

| Stream/Prodoct | $\xi_{s,T0}$ | $\xi_{s,T1}$ | $\xi_{s,T2}$ | $\delta_{p,T2}$ | $\delta_{p,T3}$ | $\delta_{p,T4}$ | $\delta_{p,T5}$ |
|----------------|--------------|--------------|--------------|-----------------|-----------------|-----------------|-----------------|
| S1 to S3       | 50           | 30           | 20           | -               | -               | -               | -               |
| P1             | -            | -            | -            | 65              | 70              | 70              | 70              |
| P2             | -            | -            | -            | 45              | 50              | 50              | 50              |
| P3             | -            | -            | -            | 25              | 30              | 30              | 30              |
| P4             | -            | -            | -            | 25              | 30              | 30              | 30              |

**Table S25.** Stream availability and product demand for Instance 15

| Stream/Prodouct | $\xi_{s,T0}$ | $\xi_{s,T1}$ | $\xi_{s,T2}$ | $\delta_{p,T2}$ | $\delta_{p,T3}$ | $\delta_{p,T4}$ | $\delta_{p,T5}$ |
|-----------------|--------------|--------------|--------------|-----------------|-----------------|-----------------|-----------------|
| S1              | 10           | 10           | 10           | -               | -               | -               | -               |
| S2              | 30           | 30           | 30           | -               | -               | -               | -               |
| P1              | -            | -            | -            | 15              | 15              | 15              | 15              |
| P2              | -            | -            | -            | 15              | 15              | 15              | 15              |

**Table S26.** Stream availability and product demand for Instance 16

| Stream/Prodouct | $\xi_{s,T0}$ | $\xi_{s,T1}$ | $\xi_{s,T2}$ | $\delta_{p,T2}$ | $\delta_{p,T3}$ | $\delta_{p,T4}$ | $\delta_{p,T5}$ |
|-----------------|--------------|--------------|--------------|-----------------|-----------------|-----------------|-----------------|
| S1              | 10           | 10           | 10           | -               | -               | -               | -               |
| S2              | 30           | 30           | 30           | -               | -               | -               | -               |
| P1              | -            | -            | -            | 15              | 15              | 15              | 15              |
| P2              | -            | -            | -            | 15              | 15              | 15              | 15              |

**Table S27.** Stream availability and product demand for Instance 17 and 18

| Stream/Prodouct | $\xi_{s,T0}$ | $\xi_{s,T1}$ | $\xi_{s,T2}$ | $\delta_{p,T2}$ | $\delta_{p,T3}$ | $\delta_{p,T4}$ | $\delta_{p,T5}$ |
|-----------------|--------------|--------------|--------------|-----------------|-----------------|-----------------|-----------------|
| S1              | 10           | 10           | 10           | -               | -               | -               | -               |
| S2              | 30           | 30           | 30           | -               | -               | -               | -               |
| P1              | -            | -            | -            | 10              | 10              | 10              | 10              |
| P2              | -            | -            | -            | 20              | 20              | 20              | 20              |

**Table S28.** Stream availability and product demand for Instance 19

| Stream/Prodouct | $\xi_{s,T0}$ | $\xi_{s,T1}$ | $\xi_{s,T2}$ | $\delta_{p,T2}$ | $\delta_{p,T3}$ | $\delta_{p,T4}$ | $\delta_{p,T5}$ |
|-----------------|--------------|--------------|--------------|-----------------|-----------------|-----------------|-----------------|
| S1              | 10           | 10           | 10           | -               | -               | -               | -               |
| S2              | 30           | 30           | 30           | -               | -               | -               | -               |
| P1              | -            | -            | -            | 10              | 10              | 10              | 10              |
| P2              | -            | -            | -            | 10              | 10              | 10              | 10              |

**Table S29.** Stream availability and product demand for Instance 20

| Stream/Prodouct | $\xi_{s,T0}$ | $\xi_{s,T1}$ | $\xi_{s,T2}$ | $\delta_{p,T2}$ | $\delta_{p,T3}$ | $\delta_{p,T4}$ | $\delta_{p,T5}$ |
|-----------------|--------------|--------------|--------------|-----------------|-----------------|-----------------|-----------------|
| S1              | 10           | 10           | 10           | -               | -               | -               | -               |
| S2              | 30           | 30           | 30           | -               | -               | -               | -               |
| P1              | -            | -            | -            | 12              | 12              | 12              | 12              |
| P2              | -            | -            | -            | 15              | 15              | 15              | 15              |

## Network configurations

For Instance 1 to 12, we assign full connectivity between streams and blenders, and full connectivity between blenders and products. Blenders are not connected with other blenders, and direct flow from stream to product is not allowed.

Network configuration for Instance 13 to 15 is given below in Figure S1.

Instance 16 to 20 share the same network configuration, which is given in Figure 10. Capacity for stream storage, blenders and product storage are 150, 200 and 100, respectively, for all instances.

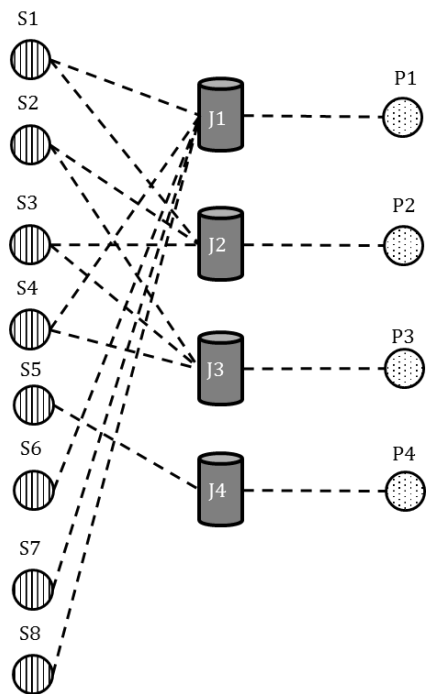

**Figure S1.** Network configuration for Instance 13-15.



**Table S30.** CPU time for  $M_x^C$  in seconds with solver BARON

|             | $M^C$   | $M_P^C$ | $M_{II P}^C$ | $M_{I II P}^C$ |
|-------------|---------|---------|--------------|----------------|
| Instance 1  | 7200.76 | 84.61   | 137.32       | 400.55         |
| Instance 2  | 7200    | 441.87  | 257.26       | 370.12         |
| Instance 3  | 7200    | 1014.35 | 1466.3       | 1454.1         |
| Instance 4  | 7200    | 3273.49 | 3387         | 2914.81        |
| Instance 5  | 7200    | 7200    | 7200.97      | 7201           |
| Instance 6  | 7200.02 | 322.83  | 537.38       | 724.26         |
| Instance 7  | 7200.01 | 1366.58 | 1908.35      | 7200.02        |
| Instance 8  | 7200    | 1197.75 | 552.08       | 7200.2         |
| Instance 9  | 671.3   | 5259.31 | 1533.67      | 4416.28        |
| Instance 10 | 459.83  | 609.43  | 2307.38      | 1704.5         |
| Instance 11 | 7200    | 7200    | 7200.01      | 7200           |
| Instance 12 | 6242.21 | 7200.01 | 7200         | 7200.36        |
| Instance 13 | 7200    | 7200    | 7200.54      | 7201.01        |
| Instance 14 | 1106.41 | 5388.72 | 2454.77      | 4987.94        |
| Instance 15 | 125.65  | 133.96  | 449.63       | 293.42         |
| Instance 16 | 7200.01 | 4404.33 | 7201.13      | 7201.2         |
| Instance 17 | 7200.55 | 108.44  | 86.35        | 137.15         |
| Instance 18 | 7200.07 | 7200.84 | 1888.39      | 3514.83        |
| Instance 19 | 7200.58 | 297.21  | 3433.6       | 1221.66        |
| Instance 20 | 7200.68 | 751.15  | 427.56       | 1453.54        |

**Table S31.** CPU time for  $M_x^{SB}$  in seconds with solver BARON

|             | $M^{SB}$ | $M_P^{SB}$ | $M_{II P}^{SB}$ | $M_{I II P}^{SB}$ |
|-------------|----------|------------|-----------------|-------------------|
| Instance 1  | 1369.82  | 166.57     | 61.83           | 155.69            |
| Instance 2  | 7200.01  | 7200.01    | 7200.03         | 7200.05           |
| Instance 3  | 7200.01  | 7200.01    | 7200.03         | 7200.03           |
| Instance 4  | 7200.01  | 7200.01    | 7200.03         | 7200.04           |
| Instance 5  | 7200.01  | 7203.01    | 76.48           | 7201.2            |
| Instance 6  | 408.17   | 794.68     | 858.14          | 1121.59           |
| Instance 7  | 7200.08  | 4977.96    | 2036.91         | 7200.3            |
| Instance 8  | 7200.09  | 7200.09    | 2333.08         | 7200.45           |
| Instance 9  | 7200.07  | 7200.09    | 7200.27         | 7200.32           |
| Instance 10 | 887.74   | 3111.01    | 1030.47         | 6499.18           |
| Instance 11 | 5.9      | 7.75       | 364.55          | 12.78             |
| Instance 12 | 7.74     | 7.86       | 13.2            | 8.42              |
| Instance 13 | 5.91     | 11.45      | 363.83          | 11.98             |
| Instance 14 | 1782.56  | 5297.24    | 554.71          | 7201.33           |
| Instance 15 | 675.05   | 261.8      | 427.91          | 719.82            |
| Instance 16 | 2514.71  | 4698.62    | 5207.1          | 4880.2            |
| Instance 17 | 572.23   | 534.78     | 627.02          | 382.45            |
| Instance 18 | 426.95   | 398.58     | 465.57          | 4730.3            |
| Instance 19 | 7200     | 1729.1     | 2439.49         | 5736.67           |
| Instance 20 | 1055.07  | 7201.14    | 1530.83         | 951.01            |

**Table S32.** CPU time for  $L_2M_x^C$  in seconds with solver CPLEX

|             | $L_2M^C$ | $L_2M_P^C$ | $L_2M_{IP}^C$ | $L_2M_{IIP}^C$ |
|-------------|----------|------------|---------------|----------------|
| Instance 1  | 7200.136 | 902.36     | 905.594       | 804.264        |
| Instance 2  | 7200.092 | 2754.485   | 2562.397      | 987.47         |
| Instance 3  | 7200.239 | 784.28     | 793.5         | 3186.278       |
| Instance 4  | 7200.08  | 2532.058   | 2697.156      | 1120.176       |
| Instance 5  | 7200.236 | 2438.894   | 2470.138      | 3392.823       |
| Instance 6  | 779.347  | 657.147    | 654.382       | 742.831        |
| Instance 7  | 58.916   | 66.903     | 67.498        | 7200.038       |
| Instance 8  | 1.93     | 1.649      | 1.654         | 3.101          |
| Instance 9  | 71.851   | 38.513     | 38.386        | 97.984         |
| Instance 10 | 49.541   | 21.832     | 21.905        | 108.197        |
| Instance 11 | 252.639  | 244.24     | 169.458       | 34.063         |
| Instance 12 | 246.051  | 37.796     | 38.051        | 10.76          |
| Instance 13 | 7.561    | 133.659    | 133.879       | 23.492         |
| Instance 14 | 4.579    | 4.136      | 4.356         | 208.576        |
| Instance 15 | 4.944    | 5.661      | 5.431         | 19.183         |
| Instance 16 | 31.07    | 85.999     | 90.463        | 48.341         |
| Instance 17 | 7200.052 | 1424.856   | 1425.785      | 1791.575       |
| Instance 18 | 21.646   | 6.86       | 7.248         | 196.092        |
| Instance 19 | 3.74     | 26.658     | 26.357        | 1.71           |
| Instance 20 | 36.599   | 12.806     | 12.667        | 3671.4         |

**Table S33.** CPU time for  $L_2M_x^{SB}$  in seconds with solver CPLEX

|             | $L_2M^{SB}$ | $L_2M_P^{SB}$ | $L_2M_{IP}^{SB}$ | $L_2M_{IIP}^{SB}$ |
|-------------|-------------|---------------|------------------|-------------------|
| Instance 1  | 145.874     | 588.465       | 595.98           | 385.42            |
| Instance 2  | 1344.869    | 1835.007      | 1813.482         | 705.045           |
| Instance 3  | 930.568     | 4457.964      | 4248.783         | 3149.107          |
| Instance 4  | 7200.02     | 3803.238      | 3998.611         | 7200.03           |
| Instance 5  | 221.501     | 174.874       | 113.308          | 967.713           |
| Instance 6  | 1725.253    | 1312.426      | 1276.238         | 1327.331          |
| Instance 7  | 7200.073    | 7200.076      | 7200.08          | 7200.079          |
| Instance 8  | 7200.113    | 7200.069      | 7200.079         | 7200.084          |
| Instance 9  | 7200.079    | 7200.069      | 7200.114         | 7200.068          |
| Instance 10 | 90.507      | 40.269        | 39.812           | 63.69             |
| Instance 11 | 56.095      | 17.065        | 16.807           | 51.829            |
| Instance 12 | 21.831      | 50.162        | 49.13            | 41.433            |
| Instance 13 | 204.868     | 539.631       | 384.225          | 2636.115          |
| Instance 14 | 29.514      | 188.163       | 172.55           | 59.262            |
| Instance 15 | 7200.04     | 7200.042      | 7200.044         | 7200.051          |
| Instance 16 | 427.9       | 355.066       | 328.818          | 364.704           |
| Instance 17 | 439.443     | 588.6         | 587.319          | 444.588           |
| Instance 18 | 1171.911    | 455.845       | 447.919          | 432.812           |
| Instance 19 | 7200.046    | 4548.141      | 4543.27          | 192.847           |
| Instance 20 | 54.134      | 29.334        | 29.932           | 303.463           |
